# Supplementary material for: Caveolin-3 promotes glycometabolism, growth and proliferation in muscle cells
Source: PubMed Central journal article supplement (PMC5716543; doi:10.1371/journal.pone.0189004), 2017-12-05
Supplement: pone.0189004.s001.pdf [file pone.0189004.s001.pdf]

| Arbitrary cell size |       | Group | Cell number( $10^4$ ) |       |       |       |
|---------------------|-------|-------|-----------------------|-------|-------|-------|
| NC                  | WT    |       | 1 day                 | 2 day | 3 day | 4 day |
| 31855               | 65262 | NC    | 0.2                   | 0.5   | 1.875 | 3.125 |
| 31133               | 43875 | NC    | 0.2                   | 0.375 | 1.125 | 3.75  |
| 33252               | 40019 | NC    | 0.2                   | 0.375 | 1.25  | 4.125 |
| 26873               | 36132 | NC    | 0.25                  | 0.25  | 1.125 | 3.625 |
| 29553               | 32725 | NC    | 0.2                   | 0.4   | 1     | 2.5   |
| 26506               | 34808 | WT    | 0.25                  | 0.625 | 2.375 | 3.75  |
| 26264               | 34960 | WT    | 0.25                  | 0.5   | 1.625 | 4.75  |
| 23465               | 43929 | WT    | 0.375                 | 0.5   | 2     | 4.75  |
| 22814               | 73451 | WT    | 0.2                   | 0.5   | 1.875 | 4.5   |
| 23805               | 66439 | WT    | 0.2                   | 0.5   | 1.625 | 4.125 |

| EndogenousCAV3/GAPDH |        |         | CCK-8 |        |        |        |        |        |
|----------------------|--------|---------|-------|--------|--------|--------|--------|--------|
|                      | NC     | WT      | Group | 1 day  | 2 day  | 3 day  | 4 day  | 5 day  |
|                      | 0.0185 | 0.0205  | NC    | 0.0678 | 0.0852 | 0.2234 | 0.3206 | 1.0166 |
|                      | 0.0232 | 0.0233  | NC    | 0.0768 | 0.0782 | 0.1704 | 0.3216 | 1.1176 |
|                      | 0.0195 | 0.0198  | NC    | 0.0568 | 0.0852 | 0.2154 | 0.3656 | 1.4966 |
|                      | 0.0211 | 0.0223  | NC    | 0.0618 | 0.0762 | 0.2064 | 0.3906 | 1.0646 |
|                      | 0.0205 | 0.021   | NC    | 0.0638 | 0.0892 | 0.2094 | 0.3496 | 1.1836 |
| $\bar{x}$            | 0.0206 | 0.02138 | WT    | 0.1078 | 0.1162 | 0.2224 | 0.6716 | 1.4836 |
| s                    | 0.0018 | 0.00141 | WT    | 0.0738 | 0.1572 | 0.2394 | 0.6056 | 1.5316 |
|                      |        |         | WT    | 0.0698 | 0.1702 | 0.2184 | 0.5376 | 1.3296 |
|                      |        |         | WT    | 0.0768 | 0.1472 | 0.2774 | 0.6906 | 1.3606 |
|                      |        |         | WT    | 0.0668 | 0.1412 | 0.2004 | 0.7546 | 1.4896 |
