# Supplementary material for: Caveolin-3 promotes glycometabolism, growth and proliferation in muscle cells
Source: PubMed Central journal article supplement (PMC5716543; doi:10.1371/journal.pone.0189004), 2017-12-05
Supplement: pone.0189004.s002.pdf [file pone.0189004.s002.pdf]

| Glucose consumption(mmol/L) 48h |          | Glycogen( $\mu$ g) 48h |          |
|---------------------------------|----------|------------------------|----------|
| NC                              | WT       | NC                     | WT       |
| 3.7                             | 5.04     | 7.53                   | 9.01     |
| 2.29                            | 5.04     | 10.34                  | 9.45     |
| 1.77                            | 4.76     | 12.26                  | 7.24     |
| 2.09                            | 3.72     | 9.01                   | 10.63    |
| 0.78                            | 2.9      | 6.65                   | 14.33    |
| $\bar{x}$ 2.126                 | 4.292    | 9.158                  | 10.132   |
| s 1.054400                      | 0.953370 | 2.235130               | 2.643040 |

| Glycogen( $\mu$ g) 6 days |          | Glycogen( $\mu$ g) / $10^6$ cells |           |
|---------------------------|----------|-----------------------------------|-----------|
| NC                        | WT       | NC                                | WT        |
| 4.2439                    | 5.6491   | 3.450336                          | 3.766061  |
| 3.8768                    | 4.9845   | 3.178517                          | 3.510206  |
| 2.9907                    | 5.6491   | 2.932054                          | 3.103897  |
| 3.8768                    | 4.3199   | 3.285447                          | 3.085638  |
| 4.3199                    | 6.0922   | 3.176392                          | 3.807599  |
| $\bar{x}$ 3.86162         | 5.33896  | 3.2045492                         | 3.4546802 |
| s 0.527999                | 0.693508 | 0.188865                          | 0.347791  |
