# Supplementary material for: Caveolin-3 promotes glycometabolism, growth and proliferation in muscle cells
Source: PubMed Central journal article supplement (PMC5716543; doi:10.1371/journal.pone.0189004), 2017-12-05
Supplement: pone.0189004.s003.pdf [file pone.0189004.s003.pdf]

|             |  | p-Akt/Akt   |          | p-AMPK/AMPK   |        | p-p70s6K/p70s6K |        |
|-------------|--|-------------|----------|---------------|--------|-----------------|--------|
|             |  | NC          | WT       | NC            | WT     | NC              | WT     |
| -<br>x<br>s |  | 0.5023      | 0.6958   | 0.3508        | 0.8155 | 0.0985          | 0.1233 |
|             |  | 0.4112      | 0.6125   | 0.3801        | 0.4029 | 0.0762          | 0.0972 |
|             |  | 0.3627      | 0.6028   | 0.4056        | 0.5421 | 0.0782          | 0.1175 |
|             |  |             |          | 0.4613        | 0.8167 | 0.0657          | 0.0892 |
|             |  |             |          | 0.46          | 0.7593 | 0.0711          | 0.0856 |
|             |  | 0.4254      | 0.637033 | 0.4116        | 0.6673 | 0.0779          | 0.1026 |
|             |  |             |          | 0.0488        | 0.1859 | 0.0125          | 0.017  |
|             |  |             |          |               |        |                 |        |
|             |  |             |          |               |        |                 |        |
|             |  |             |          |               |        |                 |        |
|             |  | GLUT4/GAPDH |          | p-GSK3β/GSK3β |        |                 |        |
|             |  | NC          | WT       | NC            | WT     |                 |        |
| -<br>x<br>s |  | 0.129057    | 0.156342 | 0.1092        | 0.1088 |                 |        |
|             |  | 0.1432      | 0.1488   | 0.3337        | 0.1404 |                 |        |
|             |  | 0.1129      | 0.212616 | 0.142         | 0.142  |                 |        |
|             |  | 0.051225    | 0.062326 | 0.1132        | 0.0761 |                 |        |
|             |  | 0.057974    | 0.063179 | 0.3128        | 0.2253 |                 |        |
|             |  | 0.098871    | 0.128652 | 0.2021        | 0.1385 |                 |        |
|             |  | 0.04188     | 0.065017 | 0.1115        | 0.0554 |                 |        |
|             |  |             |          |               |        |                 |        |
|             |  |             |          |               |        |                 |        |
|             |  |             |          |               |        |                 |        |
